# Supplementary material
Source: PubMed Central journal article supplement (PMC3369267)

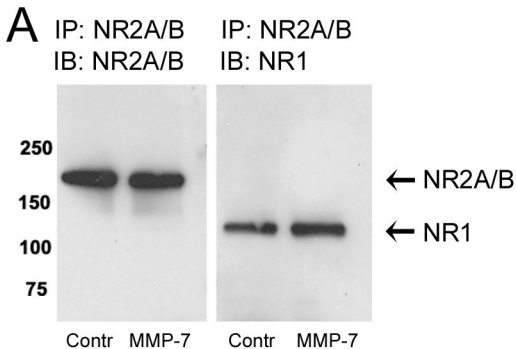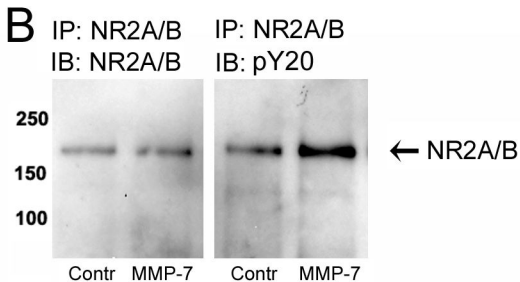

Supplement: NIHMS30874-supplement-01.pdf [file NIHMS30874-supplement-01.pdf]
